# Supplementary material for: Effective drug treatment identified by in vivo screening in a transplantable patient-derived xenograft model of chronic myelomonocytic leukemia
Source: PubMed Central journal article supplement (PMC7116758; doi:10.1038/s41375-020-0929-3), 2020-06-24
Supplement: EMS115632-supplement-Supplemental_Data.pdf [file EMS115632-supplement-Supplemental_Data.pdf]

1 **Effective drug treatment identified by in vivo screening in a transplantable patient-**  
2 **derived xenograft model of chronic myelomonocytic leukemia**

3

4 **Supplemental Data**

5 **Supplementary Methods**

6 **Cell culture**

7 K562 cells were cultured in RPMI 1640 medium (Gibco, Thermofisher Scientific, Bremen,  
8 Germany) supplemented with 10% fetal bovine serum (FBS) and incubated at 37°C with 5%  
9 CO<sub>2</sub> in the humidified atmosphere and were regularly tested for mycoplasma contamination.  
10 For drug treatment and lentiviral infection, patient-derived CMML cells and primary CMML  
11 cells were cultured and pre-stimulated in Iscove's modified Dulbecco's medium (IMDM,  
12 StemCell Technologies, Cologne, Germany) supplemented with 20% bovine serum albumin,  
13 insulin and transferrin (BIT 9500, StemCell Technologies, Cologne, Germany), 10<sup>-4</sup> M 2-  
14 mercaptoethanol (Sigma-Aldrich, Munich, Germany), 2 mM L-Glutamine (Gibco,  
15 Thermofisher Scientific, Bremen, Germany), 20 ng/ml human IL-6, 20 ng/ml human IL-3, 20  
16 ng/ml human granulocyte colony-stimulating factor (G-CSF), 100 ng/ml human stem cell  
17 factor (SCF), 50 ng/ml thrombopoietin (TPO) and 100 ng/ml FLT3-ligand (all from  
18 PeproTech, Hamburg, Germany) and incubated at 37°C with 5% CO<sub>2</sub> in the humidified  
19 atmosphere.

20 **Viral vectors and infection of cells**

21 The lentiviral vector pCCL-c-MNDUS-MN1-pgkEGFP (11.8 kilobases) was used for MN1  
22 expression. Lentiviral control vector pCCL-c-MNDUS-pgkEGFP (7.8 kilobases) was  
23 generated by removing the MN1 expression sequence of the pCCL-c-MNDUS-MN1-  
24 pgkEGFP vector. Both vectors were used for lentivirus production by transient transfection of  
25 293T cells. Lentiviral particles were concentrated by ultracentrifugation.

26 Primary CMML cells were resuspended in culture medium with 5µg/ml protamine sulfate,  
27 centrifuged at 1500 rpm for 30 minutes in a 12 well plate coated with 5µg/cm<sup>2</sup> fibronectin  
28 (RetroNectin, Takara Bio Inc, St Germain en Laye, France) and preloaded with concentrated  
29 MN1 and EGFP lentivirus and cultured at 37°C for 24 hours.

30 shRNAs targeting the human genes *MN1*, *NRAS*, *U2AF1*, *NOTCH1*, *DNMT3A*, *BCOR*,  
31 *GATA2* and *NF1* were designed and cloned into the lentiviral plasmid  
32 pLKO5d.SFFV.EGFP.miR-N as described by Adams et al.(1) In short, 67 bp oligonucleotides  
33 encoding shRNA sequences for cloning into the miR-N cassette were purchased from  
34 Integrated DNA Technologies (IDT, Leuven, Belgium). Oligonucleotides were phosphorylated  
35 by T4 PNK (NEB, Frankfurt, Germany) at 37 °C for 45 min, heated to 95 °C for 2.5 minutes  
36 and annealed by cooling to 22 °C at 0.1 °C/second. These oligonucleotides were diluted  
37 1:500 and ligated into the BsmBI (NEB, Frankfurt, Germany) restriction site of the linearized  
38 lentiviral backbone by standard cloning procedures.

39 Lentiviral particles encoding single shRNA-expressing constructs directed against the human  
40 genes mentioned above were produced by transient transfection of 293T cells. K562 cells  
41 were resuspended in fresh lentivirus-containing supernatant supplemented with protamine  
42 sulfate (5µg/ml, Sigma-Aldrich, Munich, Germany) every 24 hours for 3 days. Transduced  
43 K562 cells were sorted for EGFP prior to RNA extraction.

44 To generate the lentiviral shRNA library, several shRNA vectors were scaled up and pooled  
45 prior transfection of 293T cells. Engrafted CMML#1-MN1 cells were isolated from mice and  
46 transduced with the lentiviral shRNA library by spin inoculation as described above. After  
47 lentiviral infection, all cells were washed three times with PBS prior in vivo or in vitro  
48 experiments.

#### 49 **Xenotransplantation, treatment and monitoring of mice**

50 One million lentivirally transduced (CMML-MN1 or CMML-EGFP) and untransduced (CMML-  
51 CTL) primary mononuclear CMML cells were transplanted intravenously in the lateral tail vein  
52 of sublethally (2,5 Gy) irradiated NSGS mice. For therapeutic studies one million patient-

53 derived CMML#1 cells isolated from bone marrow or spleen of CMML#1-MN1 bearing mice  
54 were retransplanted intravenously in the tail vein of sublethally irradiated NSGS mice.  
55 Treatment was initiated 4 weeks after transplantation with either vehicle, azacitidine (1mg/kg,  
56 intraperitoneally), trametinib (2mg/kg, oral gavage) or the combination of azacitidine and  
57 trametinib as indicated in the results section.

58 Complete blood counts were measured using an ABC Vet Automated Blood counter (Scil  
59 animal care company GmbH, Viernheim, Germany). Spleen weight and complete blood  
60 counts in peripheral blood, bone marrow and spleen were measured at sacrifice. Survival of  
61 treated mice was monitored daily. Bone marrow or spleen cells from engrafted mice were  
62 retransplanted in NSGS recipient mice up to 5 times.

63 Neither randomization, nor blinding was used in animal experiments since all animal  
64 experiments were performed with a homogeneous strain, age, and similar variance. Animals  
65 which died before the start of treatment due to engraftment failure were excluded from the  
66 study.

#### 67 **Clonogenic progenitor assay**

68 Colony-forming cell units were assayed in methylcellulose (Methocult H4100; StemCell  
69 Technologies, Cologne, Germany) supplemented with 10 ng/mL IL3, 10 ng/mL GM-CSF, 50  
70 ng/mL SCF, 50 ng/mL FLT3-ligand and 3 U/mL EPO (PeproTech, Hamburg, Germany).  
71 Vehicle, azacitidine (500 nM), trametinib (20 nM) or the combination of azacitidine (500 nM)  
72 with trametinib (20 nM) were added to methylcellulose containing 10 thousand human CMML  
73 cells and were plated in duplicate. Colonies were evaluated microscopically 20 days after  
74 plating by standard criteria.

#### 75 **Immunoblotting**

76 For MN1 immunoblotting whole cell lysates from CMML#1-MN1 PDX cells and primary  
77 CMML#1 cells were prepared with lysis buffer (20 mM HEPES, pH 7.5, 0.4 M NaCl; 1mM  
78 EDTA, 1 mM EGTA, 1 mM DTT) supplemented with one mini complete protease inhibitor

79 cocktail tablet (Roche Diagnostics, Mannheim, Germany) following sonication for 20 seconds  
80 at 30% amplitude (Sonopuls, Bandelin electronic, Berlin, Germany).

81 For immunoblotting of ERK and phosphorylated ERK, CMML-MN1 PDX and primary CMML  
82 cells were treated with either vehicle, azacitidine (1  $\mu$ M), trametinib (20 nM) or the  
83 combination of azacitidine (1  $\mu$ M) and trametinib (20 nM). 6 hours after treatment 3 million  
84 cells were collected, washed with PBS and resuspended in lysis buffer supplemented with  
85 protease and phosphatase inhibitors (Pierce RIPA buffer, Halt Protease & Phosphatase  
86 inhibitor Cocktail, all from Thermo Scientific, Rockford, USA) by gentle shaking on ice for 20  
87 minutes. After clearing lysates at 10,000 rpm for 10 minutes at 4°C, cellular protein  
88 concentrations were determined using the Pierce BCA Protein Assay Kit (Thermo Scientific,  
89 Rockford, USA).

90 Protein containing supernatants were adjusted for equal amounts and separated by SDS-  
91 PAGE, transferred to a PVDF membrane, blocked and immunoblotted with antibodies  
92 against ERK (1:1000, p44/42 MAPK (ERK1/2, 137F5), phosphorylated ERK (1:1000,  
93 Phospho-p44/42 MAPK (ERK1/2, Thr202/Tyr204), all from Cell Signaling Technology,  
94 Frankfurt, Germany,  $\beta$ -actin (1:5000, monoclonal anti- $\beta$ -actin clone AC-74, Sigma-Aldrich,  
95 Munich, Germany and MN1 (1:500, anti-MN1 ab112916, Abcam, Cambridge, UK). The  
96 secondary horseradish peroxidase-conjugated antibodies anti-rabbit (NA934) and anti-  
97 mouse (NA931V), both from GE Amersham, Freiburg, Germany) were used for  
98 chemiluminescent protein detection by Clarity Western ECL Substrate (Biorad, Munich,  
99 Germany) with a ChemiDoc MP Imaging System (Bio-Rad, Munich, Germany).

#### 100 **Next-generation sequencing for clonal tracking and shRNA screening**

101 Mutations in patient cells were evaluated by an amplicon-based next generation sequencing  
102 (NGS) approach. DNA sequencing libraries were prepared from samples at diagnosis with a  
103 custom TruSight myeloid sequencing panel according to the manufacturers' instructions  
104 (Illumina, San Diego, CA). The panel includes 46 entire genes or hotspots recurrently found

105 in myeloid leukemias (Supplementary Table S6). The details of the myeloid panel  
106 sequencing and related data analysis were described previously.(2, 3)

107 Mutations in CMML-MN1 xenografts from consecutive transplantations were assessed with  
108 an error correcting sequencing approach established previously for MRD (measurable  
109 residual disease) analysis.(3) For the MRD approach approximately 100 bp genomic regions  
110 around the known mutation positions were amplified using specially designed primers  
111 (Supplementary Table S7). Sequencing depth was 1,070-28,700 reads (median 3,800  
112 reads). The VAF was calculated from Sanger sequencing data by dividing the peak height of  
113 the variant nucleotide by the height of the consensus nucleotide.

114 Fishplots displaying changes in clonal structure over time were generated with the R  
115 package fishplot (4) using the VAFs of the mutations of patient cells or CMML-MN1 cells  
116 from consecutive transplantations at the indicated time points.

117 For the in vivo RNA interference screen we quantified the copy number of each shRNA in  
118 DNA extracted from various cell populations by NGS. Quantification of shRNA integrates  
119 followed a modified protocol for measurable residual disease assessment by NGS. In the first  
120 PCR lentiviral integrates including the shRNA-miR-N cassette were amplified by primers  
121 complementary to EGFP and WPRE sequences of the lentiviral backbone. The PCR reaction  
122 was performed with Q5 DNA polymerase (NEB, Frankfurt, Germany) with the following  
123 conditions: 98°C for 30 seconds, 30 cycles of 98°C for 10 seconds, 61°C for 30 seconds and  
124 72°C for 20 seconds, and a final step of 72°C for 2 minutes. The PCR products were cleaned  
125 up using the QIAquick PCR Purification Kit (Qiagen, Hilden, Germany). 200 nanograms of  
126 purified DNA served as templates for miR-N specific primers fused to a 20 basepair unique  
127 common sequence to amplify shRNA sequences in the second PCR (98°C for 30 seconds,  
128 30 cycles of 98°C for 10 seconds, 62°C for 30 seconds, and 72°C for 12 seconds, and a final  
129 step of 72°C for 2 minutes). The amplicons were purified with AMPure XP beads (Beckman  
130 Coulter, Krefeld, Germany) by mixing beads and PCR product at a ratio of 0.9:1 for 20  
131 minutes. For size selection, the PCR products containing supernatant was again mixed with  
132 beads at a ratio of 0.21:1 for 7 minutes and the bead-bound DNA was gently washed with

133 ethanol and solubilized with H<sub>2</sub>O. Size selected DNA was barcoded in the third PCR with  
134 common sequence specific primers fused to a unique multiplex identifier (MID), a sequence  
135 complementary to the custom sequencing primer and the Illumina adapters P5 or P7. The  
136 conditions for the third PCR reaction were 98°C for 30 seconds, 25 cycles of 98°C for 10  
137 seconds, 67°C for 50 seconds and 72°C for 12 seconds, and a final step with 72°C for 2  
138 minutes. AMPure XP beads were added to the PCR product at a ratio of 0.8:1 for 20 minutes  
139 and bead-bound DNA was washed with ethanol and solubilized in elution buffer (Qiagen,  
140 Hilden, Germany). Eluted DNA underwent an additional purification step using the Gene  
141 Read Size Selection Kit according to the manufacturer's protocol (Qiagen, Hilden, Germany).  
142 DNA from up to 40 samples was then pooled at equimolar concentrations. 600 µl of a 20 pM  
143 DNA solution was added to a MiSeq reagent v3 kit and 251 cycles were sequenced in both  
144 directions on a MiSeq sequencer (Illumina, San Diego, CA) using custom forward and  
145 reverse sequencing primers. The median number of quantified shRNA reads in transduced  
146 CMML-MN1 cells was 40,500 per sample. All primers used for amplicon-based NGS are  
147 described in Supplementary Table S8.

148 The shRNA screening results were analyzed by counting the individual shRNA sequences  
149 obtained from NGS. 73-basepair shRNA sequence signatures were defined from constant  
150 and variable loop sequences flanked by 5 basepairs. Pairwise differences between  
151 signatures were sufficiently large, i.e. the editing distance was more than 9, which was  
152 defined as the number of nucleotide differences between the signatures. One mismatch was  
153 allowed upon parsing of the signatures. As control we counted the signatures allowing 0 or 2  
154 mismatches. The error rate was less than 0.2% at each nucleotide position, therefore 1  
155 mismatch in 73 positions should occur in less than 14.6% of sequences. Further, less than  
156 2.2% (<14.6% of 14.6%) of the sequences should have 2 mismatches. Thus, shRNA  
157 sequences were accepted if we observed such a behavior for each individual shRNA.

**158 Engraftment monitoring and morphology**

159 Engraftment of human CMML cells was monitored by regular blood sampling and flow  
160 cytometric analysis using a FACS Calibur cytometer (BD Biosciences, Heidelberg, Germany)  
161 and a CytoFLEX cytometer (Beckman Coulter, Krefeld, Germany). Following erythrocyte  
162 lysis (BD Pharm Lyse, BD Biosciences, Heidelberg, Germany), peripheral blood, bone  
163 marrow and spleen cells were stained for engraftment monitoring and immunophenotyping  
164 with anti-human-antibodies CD45-PE (H130, CAT 304039), CD33-APC (WM53, CAT  
165 303408) from BioLegend (Koblenz, Germany), CD38-PE (HB-7, CAT 345806), CD34-APC  
166 (8G12, CAT 345804), CD14-PE (M $\phi$ P9, CAT 345785), CD123-APC (7G3, CAT 560087),  
167 CD3-PE (UCHT1, CAT 555333) and CD19-APC (HIB19, CAT 555415) from BD Biosciences  
168 (Heidelberg, Germany). Flow cytometry data were analyzed using FlowJo software (V10.0.7,  
169 TreeStar).

170 For morphologic analysis CMML-PDX cells were isolated from mouse bone marrow by  
171 immunomagnetic selection (Mouse Cell Depletion Kit, Miltenyi Biotec, Bergisch Gladbach,  
172 Germany). The proportion of MN1-transduced cells in these enriched cell populations was  
173 determined by EGFP-fluorescence on unstained cytopsin preparations using an Olympus  
174 BX60 (Olympus, Tokyo, Japan) microscope with a 40x/0.75 numerical aperture objective and  
175 Cell Imaging software (Olympus Life Science Europa GmbH, Hamburg, Germany) was used  
176 to capture images. Morphologic analysis of Wright-Giemsa stained cytopsin preparations  
177 was assessed via a Zeiss Axioscope A1 microscope and an Axiocamera 5s with Zeiss  
178 immersol medium, and images were processed with the Zen 2.6 lite (blue) software (Zeiss,  
179 Jena, Germany).

180

## 181 Supplementary Tables

## 182 Supplementary Table S1. Characteristics of CMML patients.

| CMML Sample    | Experiment (Figure)                                                                   | Diagnosis     | Age at diagnosis | Sex  | 2 <sup>nd</sup> diagnosis | Cyto-genetics | Mutations patient                                                                                                                                                                                                  | Mutations 2 <sup>nd</sup> Tx                                                                                                                                                                                    | Treatment               | Survival status | OS   |
|----------------|---------------------------------------------------------------------------------------|---------------|------------------|------|---------------------------|---------------|--------------------------------------------------------------------------------------------------------------------------------------------------------------------------------------------------------------------|-----------------------------------------------------------------------------------------------------------------------------------------------------------------------------------------------------------------|-------------------------|-----------------|------|
| CMML#1<br>-MN1 | Fig.1<br>Fig.2 A-D<br>Fig.3<br>Fig.4<br>Fig.5 A-G,I<br>Fig.S1 A-D<br>Fig.S5<br>Fig.S7 | MDS<br>RAEB-1 | 74               | male | CMML-1                    | 46, XY        | BCOR c.4144G>T; p.Glu1382Ter<br>DNMT3A c.2645G>A; p.Arg882His<br>U2AF1 c.101C>T; p.Ser34Phe<br>NRAS c.35G>T; p.Gly12Val<br>NRAS c.35G>A; p.Gly12Asp<br>NOTCH1<br>c.7169_7170insTGAGGATGGTT;<br>p.Leu2390PhefsTer36 | BCOR c.4144G>T; p.Glu1382Ter<br>DNMT3A c.2645G>A; p.Arg882His<br>U2AF1 c.101C>T; p.Ser34Phe<br><br>NRAS c.35G>A; p.Gly12Asp<br>NOTCH1<br>c.7169_7170insTGAGGATGGTT;<br>p.Leu2390PhefsTer36                      | Azacitidine             | alive           | 0.54 |
| CMML#2<br>-MN1 | Fig.2 E,F<br>Fig.S2 A-F                                                               | CMML-2        | 77               | male | NA                        | 45, X,-Y      | SRSF2 c.284C>A; p.Pro95His<br>TET2 c.1648C>T; p.Arg550Ter<br>TET2 c.2428C>T; p.Gln810Ter<br>NRAS c.35G>C; p.Gly12Ala<br>DNMT3A c.2332G>A; p.Val778Met<br>DNMT3A c.1637_1638insA;<br>p.Leu547AlafsTer31             | SRSF2 c.284C>A; p.Pro95His<br>TET2 c.1648C>T; p.Arg550Ter<br>TET2 c.2428C>T; p.Gln810Ter<br><br>DNMT3A c.2332G>A; p.Val778Met<br>DNMT3A c.1637_1638insA;<br>p.Leu547AlafsTer31<br>STAG2 c.3097C>T; p.Arg1033Ter | Azacitidine             | alive           | 4,78 |
| CMML#3<br>-MN1 | Fig.2 G,H<br>Fig.5 H<br>Fig.S3 A-F<br>Fig.S4                                          | CMML-1        | 72               | male | NA                        | 46 XY         | CBL c.1259G>A; p.Arg420Gln<br>IDH2 c.419G>A; p.Arg140Gln<br>SRSF2 c.284_307del;<br>p.Pro95_Arg102del<br>ASXL1 c.3015dupT; p.Glu1006Ter                                                                             | CBL c.1259G>A; p.Arg420Gln<br>IDH2 c.419G>A; p.Arg140Gln<br>SRSF2 c.284_307del;<br>p.Pro95_Arg102del<br><br>NPM1 c.860_863dupTCTG;<br>p.Trp288CysfsTer12                                                        | Decitabine              | alive           | 0.58 |
| CMML#4         | Fig.5 H,I                                                                             | CMML-1        | 69               | male | AML                       | 46, XY        | CKIT c.2447A>T; p.Asp816Val<br>SRSF2 c.284C>A; p.Pro95His                                                                                                                                                          | Not applicable                                                                                                                                                                                                  | Decitabine              | dead            | 2.79 |
| CMML#5         | Fig.5 H,I                                                                             | CMML-1        | 66               | male | AML                       | 46, XY        | CBL c.1151G>A; p.Cys384Tyr<br>SRSF2 c.284C>T; p.Pro95Leu<br>TET2 c.4240C>T; p.Gln1414Ter                                                                                                                           | Not applicable                                                                                                                                                                                                  | CPX-351,<br>alloHCT     | alive           | 2.46 |
| CMML#6         | Fig.5 H,I                                                                             | CMML-1        | 62               | male | AML                       | 46, XY        | ASXL1 c.1934dupG;<br>p.Gly646TrpfsTer12<br>SRSF2 c.284C>A; p.Pro95His                                                                                                                                              | Not applicable                                                                                                                                                                                                  | Azacitidine,<br>alloHCT | alive           | 4.87 |
| CMML#7         | Fig.5 H                                                                               | CMML-1        | 69               | male | NA                        | ND            | JAK2 c.1849G>T; p.V617F<br>ASXL1 c.2957A>G; p.N986S                                                                                                                                                                | Not applicable                                                                                                                                                                                                  | alloHCT                 | alive           | 3.29 |



183 **Supplementary Table S1 continued.**

| CMML Sample | WBC at CMML diagnosis (x10 <sup>9</sup> /L) | Neutrophils at CMML diagnosis (absolute/ $\mu$ l; %) | Monocytes at CMML diagnosis (absolute/ $\mu$ l; %) | Blasts in PB at CMML diagnosis (%) | Hemoglobin at CMML diagnosis (g/dL) | Platelets at CMML diagnosis (x10 <sup>9</sup> /L) | Blasts in bone marrow at CMML diagnosis (%) |
|-------------|---------------------------------------------|------------------------------------------------------|----------------------------------------------------|------------------------------------|-------------------------------------|---------------------------------------------------|---------------------------------------------|
| CMML#1-MN1  | 6.0                                         | 1.9; 31.3                                            | 1.7; 28.3                                          | 0.0                                | 10.2                                | 15.0                                              | 9.0                                         |
| CMML#2-MN1  | 6.5                                         | 38; 59.2                                             | 1.1; 16.5                                          | 13.6                               | 8.4                                 | 20.0                                              | 3.0                                         |
| CMML#3-MN1  | 23.1                                        | 11.2; 48.5                                           | 3.9; 16.8                                          | 0.5                                | 9.7                                 | 272.0                                             | 5.0                                         |
| CMML #4     | 23.6                                        | 11.56; 49                                            | 2.36; 10                                           | 0.0                                | 14.8                                | 81.0                                              | 7.0                                         |
| CMML #5     | ND                                          | ND                                                   | ND                                                 | ND                                 | ND                                  | ND                                                | 8.0                                         |
| CMML #6     | 44.7                                        | 23.7; 53                                             | 10.7; 24                                           | 1.0                                | 14.4                                | 136.0                                             | 6.0                                         |
| CMML#7      | 37.1                                        | 24.4; 65.7                                           | 4.1; 11.1                                          | 0.0                                | 9.0                                 | 90.0                                              | 8.0                                         |

184 Abbreviation: NA, not applicable; ND, no data.

185 **Supplementary Table S2. Technical details on serial transplantations.**

| Patient | 1 <sup>st</sup> Tx<br>Cell origin | Cell origin and number of retransplanted cells (x10 <sup>6</sup> /mouse)      |                                                                      |                                                                       |                                                                       |                                                                       |
|---------|-----------------------------------|-------------------------------------------------------------------------------|----------------------------------------------------------------------|-----------------------------------------------------------------------|-----------------------------------------------------------------------|-----------------------------------------------------------------------|
|         |                                   | 1 <sup>st</sup> Tx<br>CD3 negative<br>CMML cells<br>(x10 <sup>6</sup> /mouse) | 2 <sup>nd</sup> Tx                                                   | 3 <sup>rd</sup> Tx                                                    | 4 <sup>th</sup> Tx                                                    | 5 <sup>th</sup> Tx                                                    |
| CMML#1  | Patient bone marrow               | Untransduced (1.0)<br>EGFP (1.0)<br>MN1 (1.0)                                 | Bone marrow from 1 <sup>st</sup> Tx MN1 (0.8) (fresh cells)          | Bone marrow + spleen from 2 <sup>nd</sup> Tx MN1 (1.6) (frozen cells) | Bone marrow + Spleen from 3 <sup>rd</sup> Tx MN1 (1.2) (frozen cells) | Bone marrow + Spleen from 4 <sup>th</sup> Tx MN1 (1.5) (frozen cells) |
| CMML#2  | Patient peripheral blood          | Untransduced (1.0)<br>EGFP (1.0)<br>MN1 (1.0)                                 | Bone marrow + spleen from 1 <sup>st</sup> Tx MN1 (1.2) (fresh cells) | Bone marrow + spleen from 2 <sup>nd</sup> Tx MN1 (1.1) (fresh cells)  | NA                                                                    | NA                                                                    |
| CMML#3  | Patient peripheral blood          | Untransduced (1.3)<br>MN1 (1.3)                                               | Bone marrow + spleen from 1 <sup>st</sup> Tx MN1 (1.5) (fresh cells) | Bone marrow + spleen from 2 <sup>nd</sup> Tx MN1 (1.0) (fresh cells)  | NA                                                                    | NA                                                                    |

186 Abbreviation: Tx, transplantation; NA, not applicable.

187 **Supplementary Table S3. Sequences of primers used for validation of shRNA**  
188 **knockdown.**

| Gene          | Forward primer                  | Reverse primer          |
|---------------|---------------------------------|-------------------------|
| <i>ABL1</i>   | TGGAGATAACACTCTAAGCATAACTAAAGGT | GATGTAGTTGCTTGGGACCCA   |
| <i>BCOR</i>   | CTGTGAGCGTGCAATGATGC            | CTCGCATCTCTCACTTTCGTTTC |
| <i>DNMT3A</i> | CGCATTGTGTCTTGGTGGAT            | CATGGGCTGCTTGTGTACG     |
| <i>GATA2</i>  | CCCACCTACCCCTCCTATGT            | GCCTTCTGAACAGGAACGAG    |
| <i>MN1</i>    | CAAAGAAGCCCACGACCTC             | CGTCACCCACGTCGTCTG      |
| <i>NF1</i>    | ATGGCTCTGGCCAATGTG              | CAAGCTGTTGCCTCGGAAG     |
| <i>NOTCH1</i> | GTGAAGGCCTCGCTGCTC              | GTGGCACTCTGGAAGCACT     |
| <i>NRAS</i>   | TCCAGAACCACTTTGTAGATGAA         | CCTTCGCCTGTCTCATGTA     |
| <i>U2AF1</i>  | CGGAAAAGGCTGTGATTGAC            | GTGTGCATTCTCCCATCTCA    |

189 **Supplementary Table S4. Variant allele frequency of identified mutations from bone**  
190 **marrow cells from CMML#1-MN1 xenografts and bone marrow cells from the**  
191 **corresponding CMML#1 patient.**

| Gene          | Mutation                                          | Variant allele frequency (%) mean±SEM |                    |                    |                    |                    |                    |
|---------------|---------------------------------------------------|---------------------------------------|--------------------|--------------------|--------------------|--------------------|--------------------|
|               |                                                   | Patient                               | 1 <sup>st</sup> Tx | 2 <sup>nd</sup> Tx | 3 <sup>rd</sup> Tx | 4 <sup>th</sup> Tx | 5 <sup>th</sup> Tx |
| <i>BCOR</i>   | c.4144G>T; p.Glu1382Ter                           | 45.04                                 | 47,70              | 49.60              | 49.98              | 49.59              | 49.82              |
| <i>DNMT3A</i> | c.2645G>A; p.Arg882His                            | 45.28                                 | 44,22              | 48.73              | 49.36              | 47.33              | 48.74              |
| <i>NOTCH1</i> | c.7169_7170insTGAGGATGGTT;<br>p.Leu2390PhefsTer36 | 14                                    | 46.32              | 50.10              | 50.18              | 48.49              | 52.38              |

|              |                      |       |       |       |       |       |       |
|--------------|----------------------|-------|-------|-------|-------|-------|-------|
| <i>NRAS</i>  | c.35G>T; p.Gly12Val  | 21.3  | 0,41  | 0     | 0     | 0     | 0     |
| <i>NRAS</i>  | c.35G>A; p.Gly12Asp  | 17.77 | 48.93 | 46.97 | 49.29 | 51.82 | 50.61 |
| <i>U2AF1</i> | c.101C>T; p.Ser34Phe | 44.56 | 51.82 | 54.29 | 42.81 | 45.15 | 46.47 |

192 Abbreviation: Tx, transplantation.

193 **Supplementary Table S5. Sequences of shRNAs directed against recurrently mutated**  
 194 **genes.**

| shRNA           | Sequence                                                          |
|-----------------|-------------------------------------------------------------------|
| shMN1-2049      | ACGGGCTTCTAGTCCGACAAAATAGTGAAGCCACAGATGTATTTTGTCCGACTAGAAGCCCGG   |
| shMN1-2165      | AACGCGCAATTTCGAGTATCCCATAGTGAAGCCACAGATGTATGGGATACTCGAATTGCGCGTG  |
| shNRAS-620      | CAGGACAGTTGATACAAAACAATAGTGAAGCCACAGATGTATTGTTTTGTATCAACTGTCCCTT  |
| shNRAS-1670     | ACAGGAGAAAGATGAAACTGAATAGTGAAGCCACAGATGTATTCAGTTTCATCTTTCTCCTGG   |
| shU2AF1-116     | ACACCGAGAAAGACAAAGTCAATAGTGAAGCCACAGATGTATTGACTTTGTCTTTCTCGGTGC   |
| shU2AF1-595     | CCGCAAGAAGCATAGATCAAGATAGTGAAGCCACAGATGTATCTTGATCTATGCTTCTTGCGA   |
| shNOTCH1-8397   | CCAGGTTTCAGTATTATGTAGTTTGTAGTGAAGCCACAGATGTAACTACATAATACTGAACCTGA |
| shNOTCH1-9178   | CTAGAGTGTAGTTTACAGAAAATAGTGAAGCCACAGATGTATTTTCTGTAACTACACTCTAT    |
| shDNMT3A-1548   | ACCGGCTCTTCTTTGAGTTCTATAGTGAAGCCACAGATGTATAGAACTCAAAGAAGAGCCGGC   |
| shDNMT3A-3221   | CCCCTTTGATTGTTTTCTAAAATAGTGAAGCCACAGATGTATTTTAGAAAACAATCAAAGGT    |
| shBCOR-4253     | AACGGAGACTTATTGTCAATAATAGTGAAGCCACAGATGTATTATTGACAATAAGTCTCCGTG   |
| shBCOR-5175     | ACACCATGTACAGTGTGTTATATAGTGAAGCCACAGATGTATATAACACACTGTACATGGTGG   |
| shGATA2-176     | CCGAGGTGGACGTCTTCTTCAATAGTGAAGCCACAGATGTATTGAAGAAGACGTCCACCTCGT   |
| shGATA2-3007    | ATGAGTACTGTTAAGAATAATATAGTGAAGCCACAGATGTATATTATTCTTAACAGTACTCAC   |
| shNF1-896       | AAATGTTGATGTTTCATGATATATAGTGAAGCCACAGATGTATATATCATGAACATCAACATTG  |
| shNF1-1578      | ATGGCTCAGAATTCACCTTCTATAGTGAAGCCACAGATGTATAGAAGGTGAATTCTGAGCCAG   |
| shRen-713 (CTL) | CAGGAATTATAATGCTTATCTATAGTGAAGCCACAGATGTATAGATAAGCATTATAATTCCTA   |

195 **Supplementary Table S6. Genes covered by our custom myeloid panel (based on**  
 196 **GRCh37/hg19).**

| Gene   | Exons    | Gene  | Exons           | Gene   | Exons                  |
|--------|----------|-------|-----------------|--------|------------------------|
| ASXL1  | 12       | GATA2 | 2-6             | RUNX1  | complete               |
| ASXL2  | 11+12    | IDH1  | 4               | SETBP1 | 4                      |
| BCOR   | complete | IDH2  | 4               | SF3B1  | 13-16                  |
| BCORL1 | complete | JAK2  | 12, 14          | SMC1A  | 2, 11, 16, 17          |
| BRAF   | Exon15   | KDM6A | complete        | SMC3   | 10, 13, 19, 23, 25, 28 |
| CALR   | 9        | KIT   | 2, 8-11, 13, 17 | SRSF2  | 1                      |
| CBL    | 8, 9     | KRAS  | 2-5             | STAG1  | complete               |

|         |           |        |          |        |          |
|---------|-----------|--------|----------|--------|----------|
| CEBPA   | complete  | MPL    | 10       | STAG2  | complete |
| CSF3R   | 14-17     | MYC    | 2        | TET2   | 3-11     |
| CSNK1A1 | 3, 4      | NF1    | complete | TP53   | 2-11     |
| DDX41   | complete  | NPM1   | 11       | U2AF1  | 2, 6     |
| DNMT3A  | complete  | NRAS   | 2-5      | WT1    | 7, 9     |
| ETNK1   | 3         | PHF6   | complete | ZBTB7A | 2, 3     |
| ETV6    | complete  | PPM1D  | 1-6      | ZRSR2  | complete |
| EZH2    | complete  | PTPN11 | 3, 13    |        |          |
| FLT3    | 14-16, 20 | RAD21  | complete |        |          |

197 **Supplementary Table S7. Primers used for error corrected sequencing.**

| Primer name          | Forward                | Reverse              |
|----------------------|------------------------|----------------------|
| NRAS_NGS_1           | GCTCGCCAATTAACCCTGAT   | AGTGGTCTGGATTAGCTGGA |
| U2AF1_NGS_31         | CCCAGCAAATAATCAGCTCTCA | ACAAACCTGGCTAAACGTCG |
| DNMT3A_NGS_882       | GGTATTTGGTTTCCAGTCC    | GAAGAGGTGGCGGATGACT  |
| BCOR_NGS_1375_1391   | GAGAAGCCATCCGGGAAGAG   | GGGTCAAGAGGTACCTTGCC |
| NOTCH1_NGS_2383_2412 | GATGATGAGCTACCAGGGCC   | CTGCTGCTGGATGTTTGCTG |

198 **Supplementary Table S8. Sequences of primers used for amplicon-based next**  
 199 **generation sequencing.**

| PCR                                   | Primer sequence                                                                                                                                                                                                                     |
|---------------------------------------|-------------------------------------------------------------------------------------------------------------------------------------------------------------------------------------------------------------------------------------|
| 1. Lentivirus backbone                | EGFP forward: CAAGATCCGCCACAACATCG<br>WPRE reverse: CCACATAGCGTAAAAGGAGCAAC                                                                                                                                                         |
| 2. miR30N+ common sequence            | CS3-miR30N F: GGTAACACAAGGGCACTGGGATTACTTCTTCAGGTTAACCCAACAG<br>CS4-miR30N R: CGGACTACAGCTCCCATCATTGCTCCTAAAGTAGCCCTTGAAGTCC                                                                                                        |
| 3. Multiplex Identifier (MID,barcode) | e.g. MID1-CS3 F: AATGATACGGCGACCACCGAGATCTACACTCTTCCCTACACGACG<br>CTCTCCGATCTAACGAGTGCGTGGTAAACACAAGGGCACTGG<br>e.g. MID2-CS4 R: CAAGCAGAAGACGGCATAACGAGATACATCTAGTGGCTCAGAGTTCTAC<br>AGTCCGACG ATCATACGCTCGACACGGACTACAGCTCCCATCAT |

200 **Supplementary Figures**

201 **Supplementary Figure S1. MN1 expression is required for engraftment of human**  
202 **CMML cells.**

203 A) Transduction efficiency of EGFP-transduced (CMML#1-EGFP) and MN1-transduced  
204 (CMML#1-MN1) primary CMML cells prior transplantation in NSGS recipient mice.

205 B) Representative flow cytometric analysis of cells isolated from blood, bone marrow and  
206 spleen of NSGS recipient mice 13 weeks after transplantation indicating CMML#1-MN1  
207 engraftment by hCD45+EGFP+ cells.

208 C) Light and fluorescence microscopy from bone marrow smears of a CMML#1-MN1  
209 mouse, in which CMML#1-MN1 cells engrafted as indicated by EGFP fluorescence.

210 D) Immunophenotype of engrafted CMML#1-MN1 cells in bone marrow and spleen of a  
211 representative secondary recipient mouse.

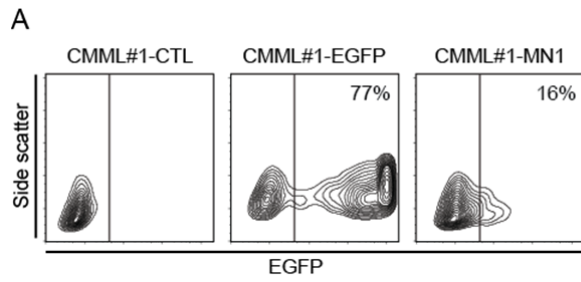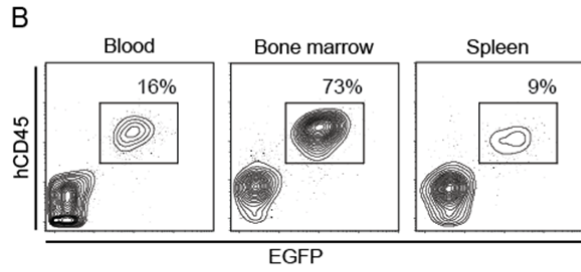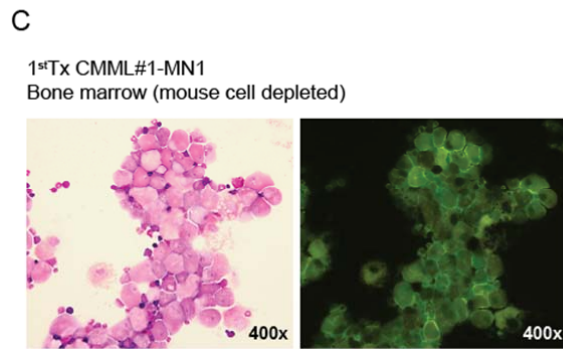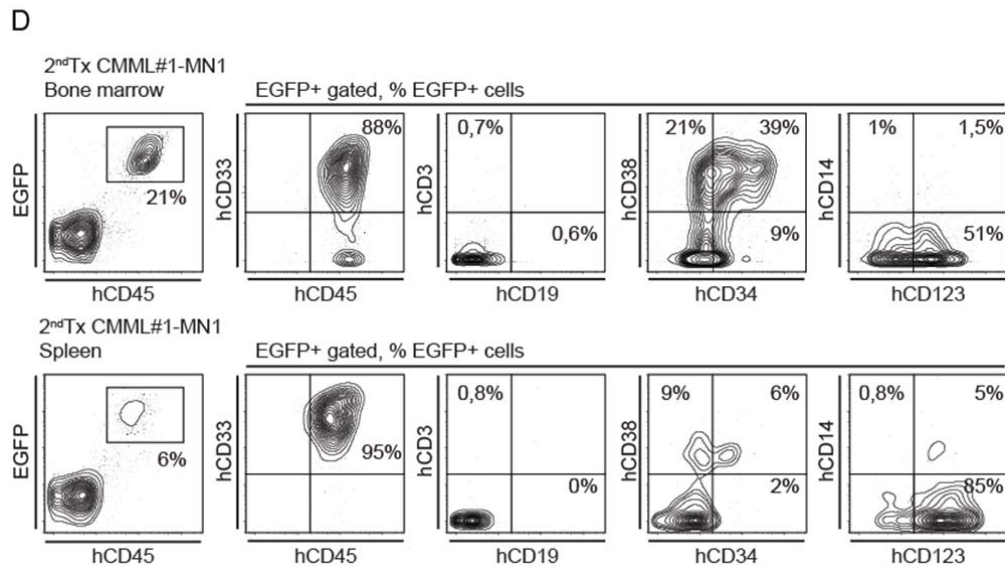

213 **Supplementary Figure S2. Robust engraftment of CMML#2-MN1 cells in vivo.**

- 214 A) Engraftment of CMML#2 cells (human CD45+) in the peripheral blood, bone marrow  
215 and spleen of secondary recipient NSGS mice (number of analyzed mice is indicated in  
216 the figure; mean  $\pm$  SEM).
- 217 B) Spleen weight of CMML#2 secondary recipient NSGS mice at sacrifice (number of  
218 analyzed mice is indicated in the figure; mean  $\pm$  SEM).
- 219 C) Platelet count in peripheral blood of CMML#2 secondary recipient NSGS mice at  
220 sacrifice (number of analyzed mice is indicated in the figure; mean  $\pm$  SEM).
- 221 D) White blood cell count in peripheral blood of CMML#2 secondary recipient NSGS mice  
222 at sacrifice (number of analyzed mice is indicated in the figure; mean  $\pm$  SEM).
- 223 E) Hemoglobin level in peripheral blood of CMML#2 secondary recipient NSGS mice at  
224 sacrifice (number of analyzed mice is indicated in the figure; mean  $\pm$  SEM).
- 225 F) Morphology from bone marrow smears of the CMML#2 patient at diagnosis and from a  
226 CMML#2 secondary recipient mouse at sacrifice.

**A**

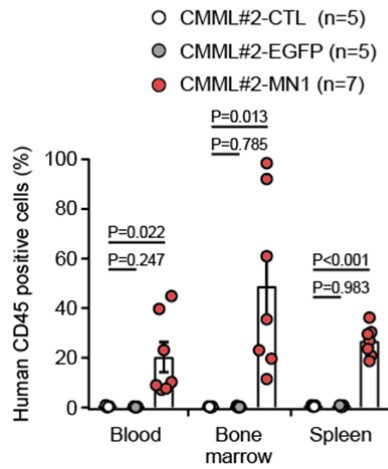

**B**

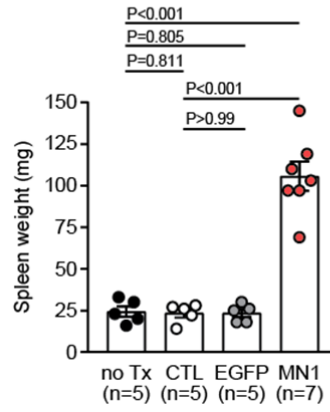

**C**

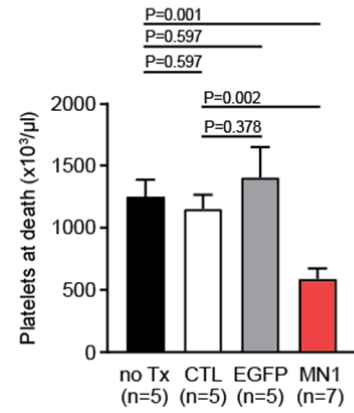

**D**

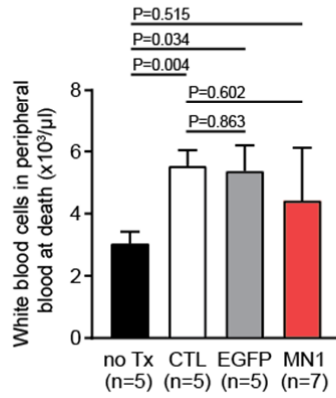

**E**

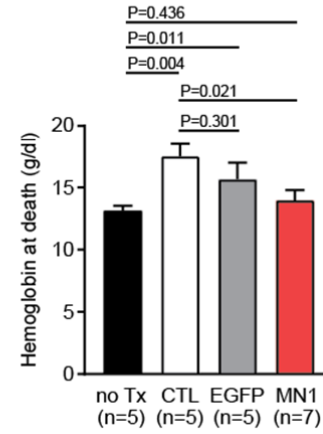

**F**

Patient (CMML#2) at diagnosis  
Bone marrow

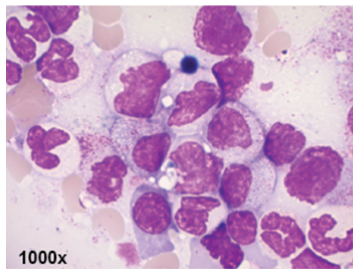

2<sup>nd</sup>Tx CMML#2-MN1  
Bone marrow (mouse cell depleted)

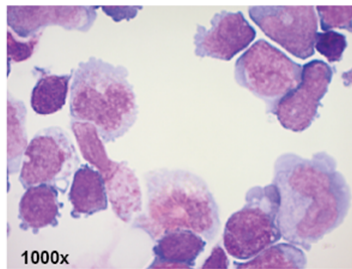



**228 Supplementary Figure S3. Robust engraftment of CMML#3-MN1 cells in vivo.**

- 229 A) Engraftment of CMML#3 cells (human CD45+) in the peripheral blood, bone marrow  
230 and spleen of secondary recipient NSGS mice (number of analyzed mice is indicated in  
231 the figure; mean  $\pm$  SEM).
- 232 B) Spleen weight of CMML#3 secondary recipient NSGS mice at sacrifice (number of  
233 analyzed mice is indicated in the figure; mean  $\pm$  SEM)
- 234 C) Platelet count in peripheral blood of CMML#3 secondary recipient NSGS mice at  
235 sacrifice (number of analyzed mice is indicated in the figure; mean  $\pm$  SEM).
- 236 D) White blood cell count in peripheral blood of CMML#3 secondary recipient NSGS mice  
237 at sacrifice (number of analyzed mice is indicated in the figure; mean  $\pm$  SEM).
- 238 E) Hemoglobin level in peripheral blood of CMML#3 secondary recipient NSGS mice at  
239 sacrifice (number of analyzed mice is indicated in the figure; mean  $\pm$  SEM).
- 240 F) Morphology from bone marrow smears of the CMML#3 patient at diagnosis and from a  
241 CMML#3 secondary recipient mouse at sacrifice.

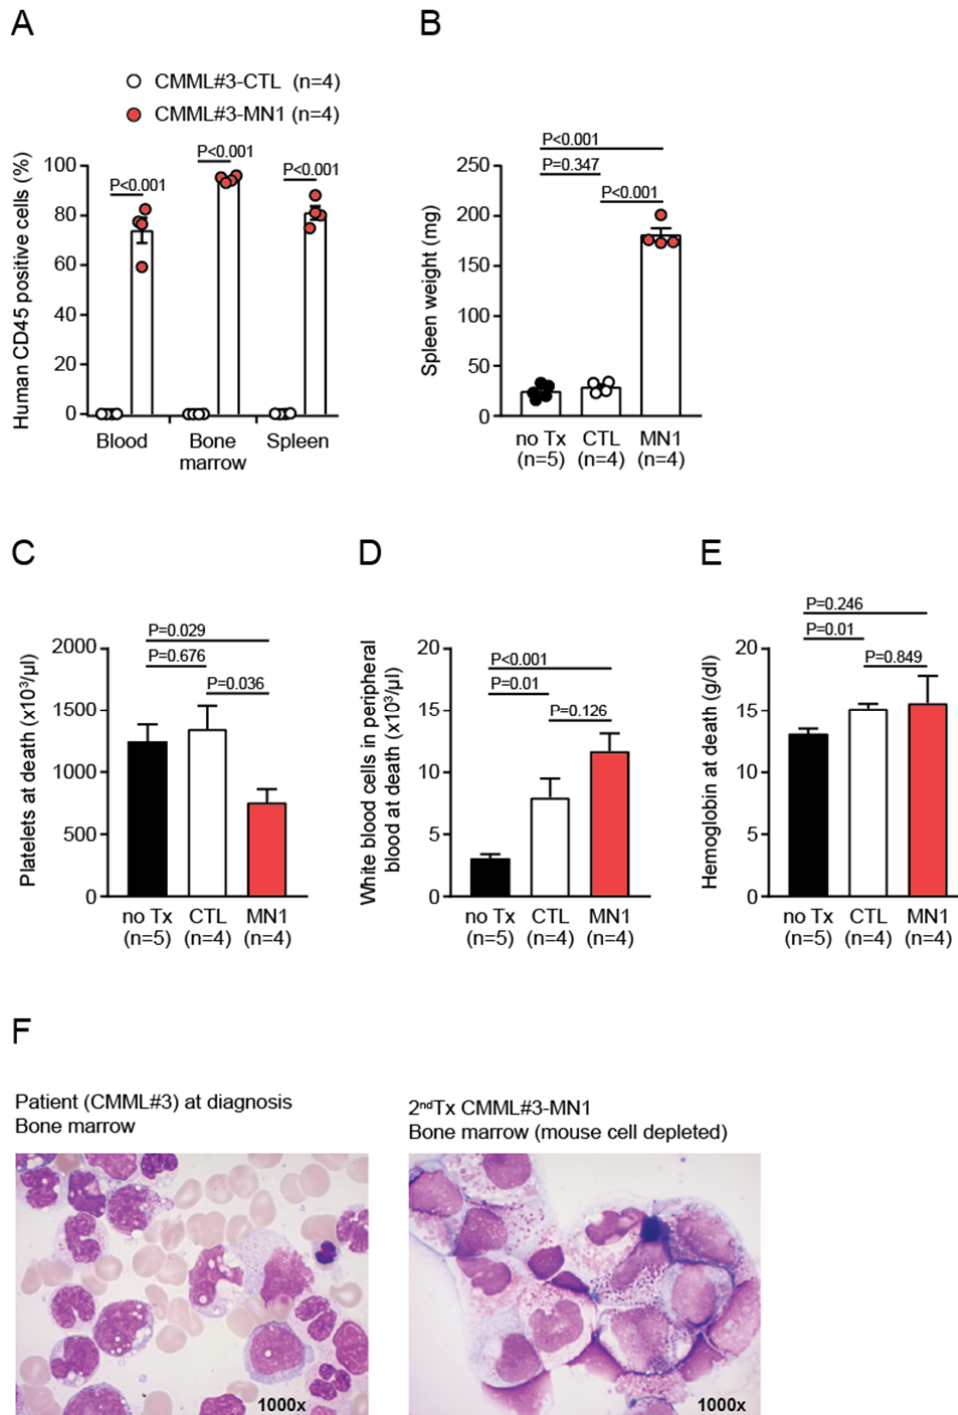

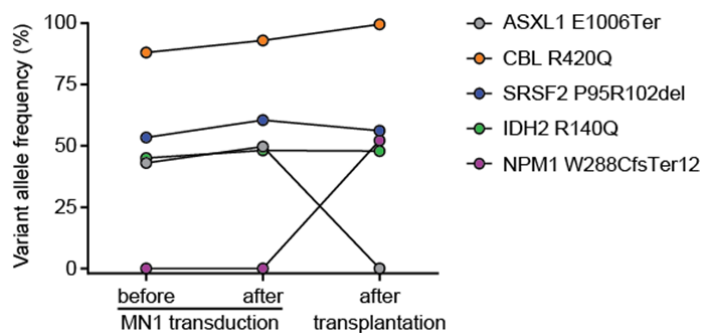

247

248 **Supplementary Figure S5. Engraftment of CMML#1-MN1 cells is enhanced by GM-CSF.**249 Engraftment kinetics of CMML#1-MN1 cells from 4<sup>th</sup> transplantation in NSG or NSGS250 recipient mice at the indicated time points (\* indicates time of sacrifice; n=4, mean  $\pm$  SEM).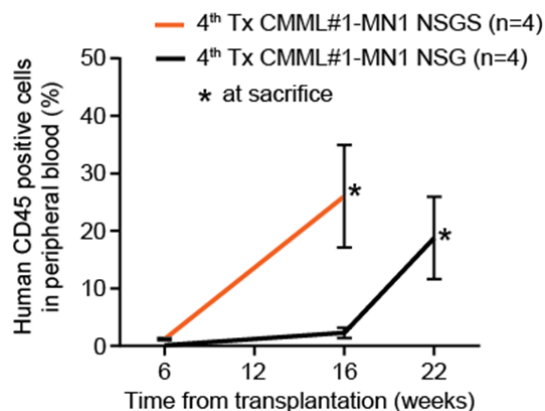

251

252 **Supplementary Figure S6. Validation of shRNAs directed against recurrently mutated**  
253 **genes.**

254 Relative gene expression quantified by qRT-PCR in K562 cells transduced with shRNAs

255 targeting the genes *MN1*, *NRAS*, *U2AF1*, *NOTCH1*, *DNMT3A*, *BCOR*, *GATA2* and *NF1*.256 Expression levels are relative to the *ABL1* housekeeping gene and normalized to gene

257 expression in K562 cells transduced with a shRNA targeting the luciferase gene (shCTL)

258 (n=3, mean  $\pm$  SEM).

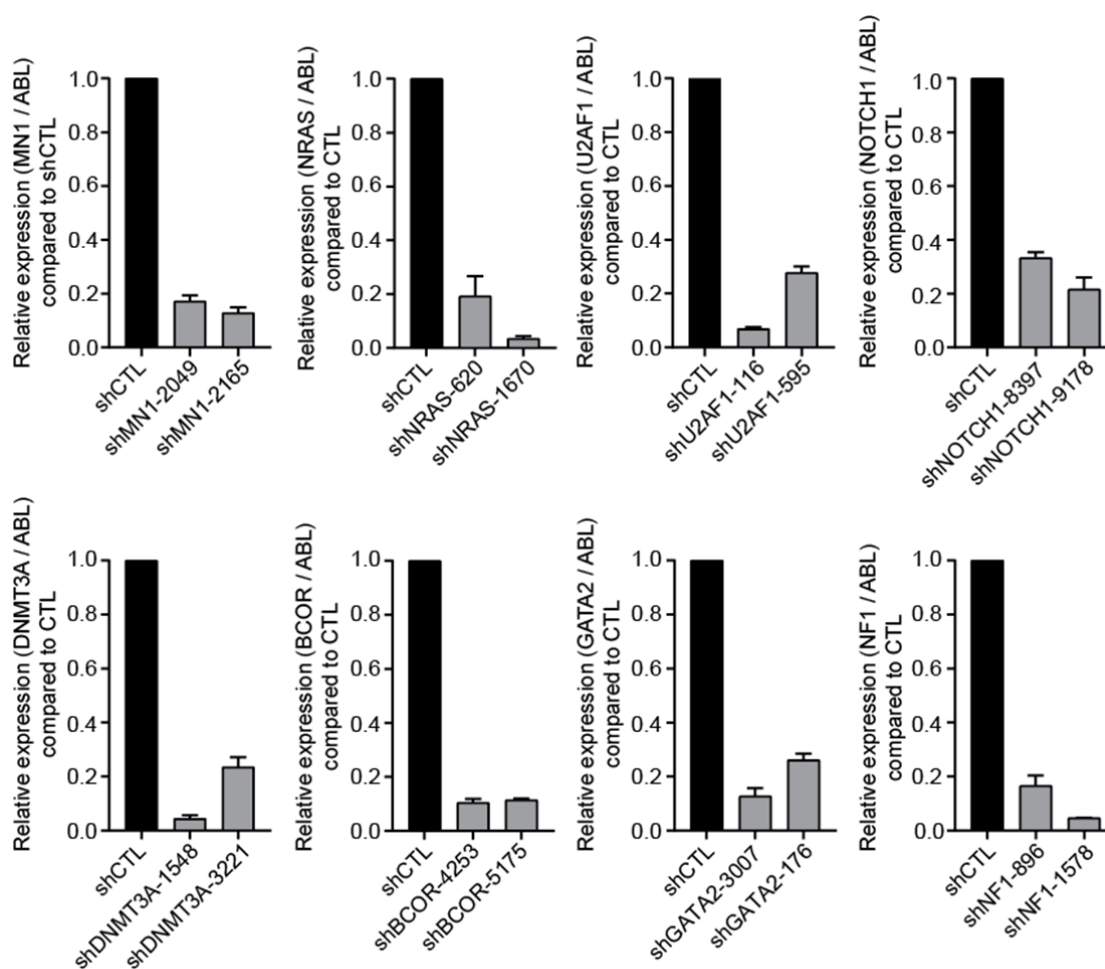

259

260 **Supplementary Figure S7. The MEK-inhibitor trametinib reduces engraftment of**  
 261 **CMML#1-MN1 cells in vivo when combined with azacitidine.**

262 A) Representative flow cytometric analysis of cells from peripheral blood of NSGS  
 263 recipient mice 2 weeks after transplantation indicating CMML#1-MN1 engraftment by  
 264 human CD45+EGFP+ cells.

265 B) Engraftment of CMML#1-MN1 cells in peripheral blood of mice treated with vehicle,  
 266 trametinib, azacitidine and the combination of trametinib+azacitidine at the indicated  
 267 time points (arrow indicates start of treatment, number of analyzed mice is indicated  
 268 in the figure, mean  $\pm$  SEM).

269 C) Engraftment of CMML#-MN1 cells in blood, bone marrow and spleen of recipient mice  
 270 treated with vehicle, trametinib, azacitidine and the combination of

271 trametinib+azacitidine at sacrifice (number of analyzed mice is indicated in the figure,  
 272 mean  $\pm$  SEM).

A

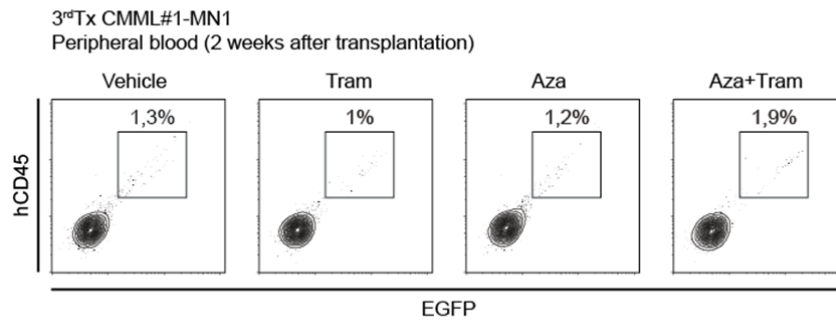

B

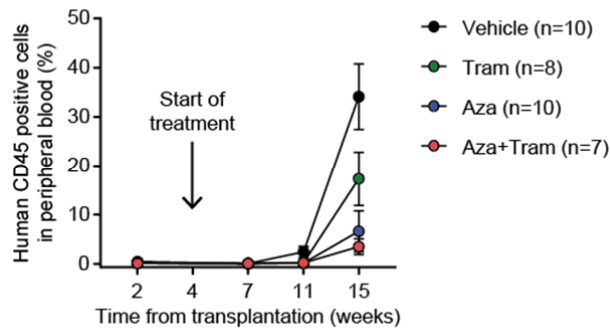

C

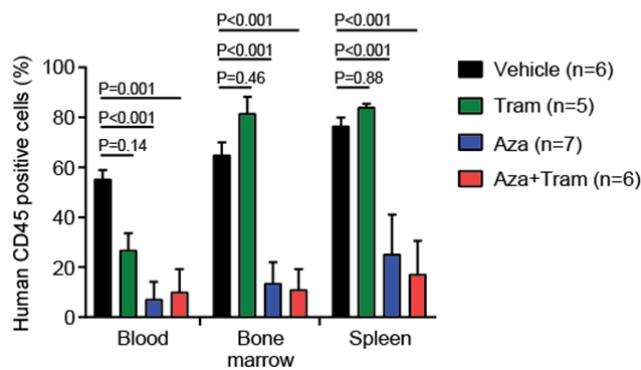

273

## 274 Supplementary References

- 275 1. Adams FF, Heckl D, Hoffmann T, Talbot SR, Kloos A, Thol F, et al. An optimized  
 276 lentiviral vector system for conditional RNAi and efficient cloning of microRNA embedded  
 277 short hairpin RNA libraries. *Biomaterials*. 2017;139:102-15.  
 278 2. Heuser M, Gabdoulline R, Loffeld P, Dobbernack V, Kreimeyer H, Pankratz M, et al.  
 279 Individual outcome prediction for myelodysplastic syndrome (MDS) and secondary acute

- 280 myeloid leukemia from MDS after allogeneic hematopoietic cell transplantation. *Annals of*  
281 *hematology*. 2017;96(8):1361-72.
- 282 3. Thol F, Gabdoulline R, Liebich A, Klement P, Schiller J, Kandziora C, et al.  
283 Measurable residual disease monitoring by NGS before allogeneic hematopoietic cell  
284 transplantation in AML. *Blood*. 2018;132(16):1703-13.
- 285 4. Miller CA, McMichael J, Dang HX, Maher CA, Ding L, Ley TJ, et al. Visualizing tumor  
286 evolution with the fishplot package for R. *BMC genomics*. 2016;17(1):880.  
287
